# Supplementary material
Source: Springer Nature journal article supplement (https://www.springermedizin.de/resource/supplementary/12985_2014_2417_MOESM1_ESM.pdf/9607054)

**A**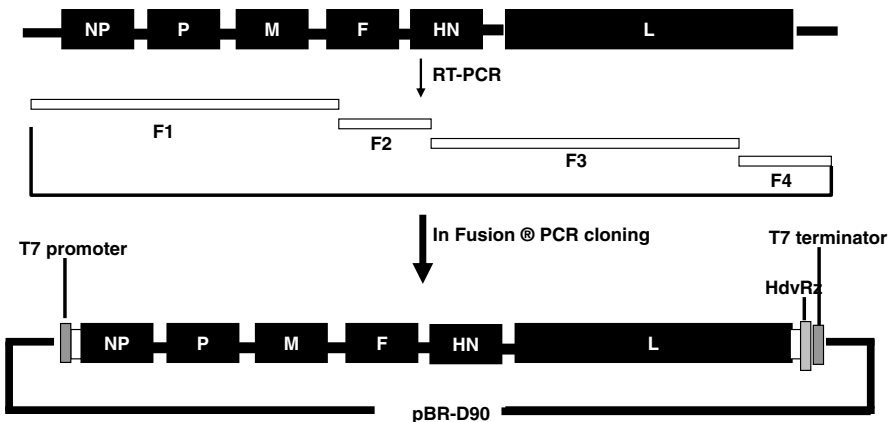**B**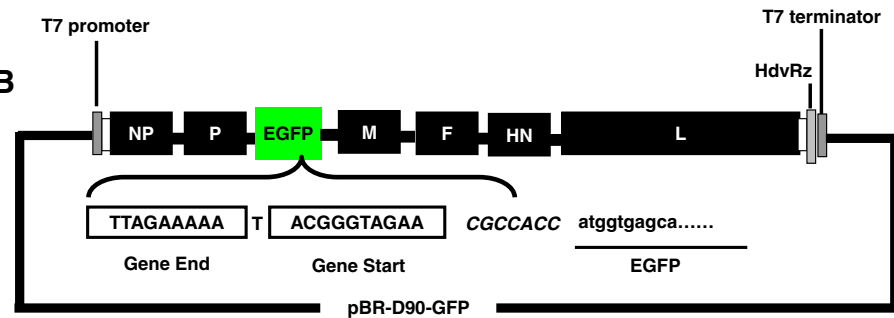

Supplement: MOESM1 [file 9607054]
